# Supplementary material
Source: publisher site journal article supplement (http://kjim.org/upload/media/kjim-2022-289-Supplementary-Fig._1.pdf)
Supplement: Supplementary file 1 [file kjim-2022-289-Supplementary-Fig._1.pdf]

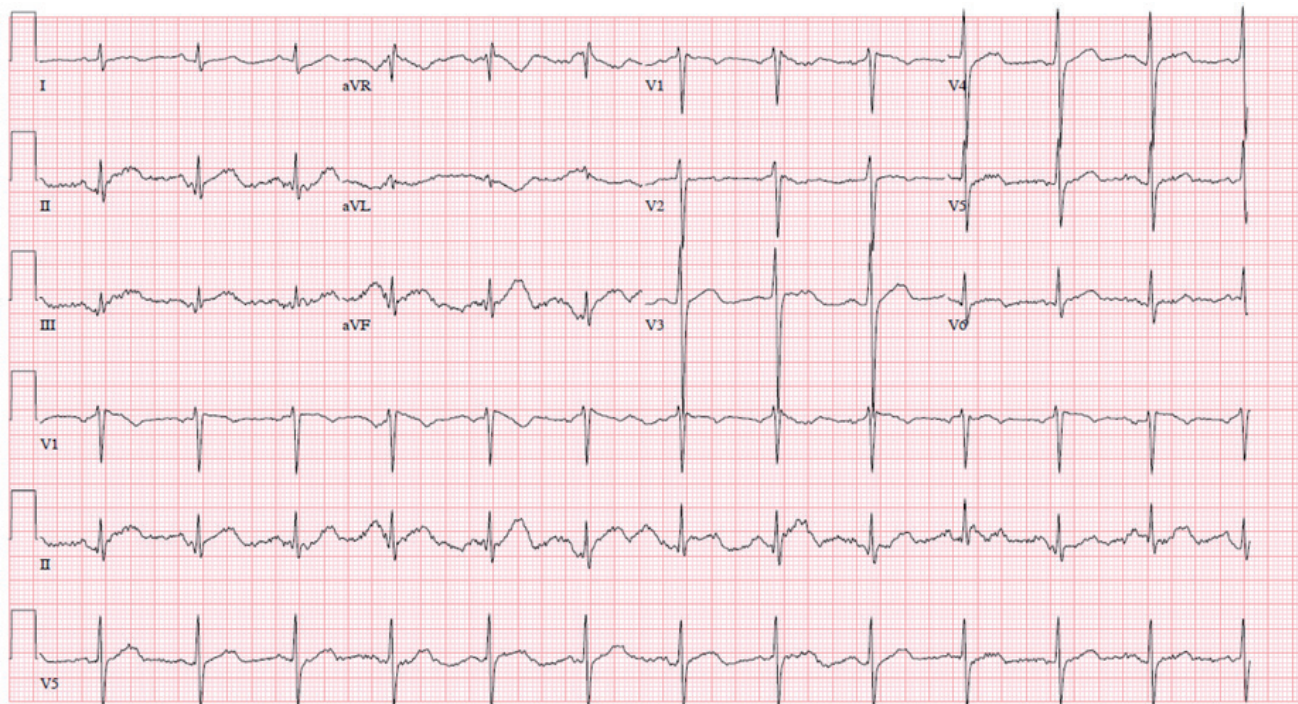

**Supplementary Figure 1.** The initial electrocardiogram showed ST-segment elevation in leads II, III, suggesting ST-segment elevation acute coronary syndrome.
